# Supplementary material for: Prey capture analyses in the carnivorous aquatic waterwheel plant (Aldrovanda vesiculosa L., Droseraceae)
Source: PubMed Central journal article supplement (PMC6901478; doi:10.1038/s41598-019-54857-w), 2019-12-09
Supplement: 41598_2019_54857_MOESM1_ESM.pdf [file 41598_2019_54857_MOESM1_ESM.pdf]

SUPPLEMENTARY INFORMATION FOR

**Prey capture analyses in the carnivorous aquatic waterwheel plant  
(*Aldrovanda vesiculosa* L., Droseraceae)**

Simon Poppinga<sup>1,2,\*</sup>, Jassir Smajj<sup>1</sup>, Anna Sofia Westermeier<sup>1,3</sup>, Sebastian Kruppert<sup>4</sup>, Martin Horstmann<sup>4</sup>, Ralph Tollrian<sup>4</sup>, Thomas Speck<sup>1,2,3,5</sup>

<sup>1</sup>*Plant Biomechanics Group, Botanic Garden, University of Freiburg, Freiburg im Breisgau, Germany.*

<sup>2</sup>*Freiburg Materials Research Center (FMF), University of Freiburg, Freiburg im Breisgau, Germany.*

<sup>3</sup>*Freiburg Center for Interactive Materials and Bioinspired Technologies (FIT), University of Freiburg, Freiburg im Breisgau, Germany.*

<sup>4</sup>*Department of Animal Ecology, Evolution and Biodiversity, Ruhr-University Bochum, Bochum, Germany.*

<sup>5</sup>*Cluster of Excellence livMatS @ FIT Freiburg Center for Interactive Materials and Bioinspired Technologies, University of Freiburg, Freiburg im Breisgau, Germany*

*\*Corresponding author. Email: [simon.poppinga@biologie.uni-freiburg.de](mailto:simon.poppinga@biologie.uni-freiburg.de)*

## Legends for Supplementary Movies

- Movie S1: Successful prey capture event (PCA) 01. Recording speed: 1,000 fps, playback rate: 20 fps.
- Movie S2: Successful prey capture event (PCA) 02. Recording speed: 1,000 fps, playback rate: 20 fps.
- Movie S3: Successful prey capture event (PCA) 03. Recording speed: 1,000 fps, playback rate: 20 fps.
- Movie S4: Successful prey capture event (PCA) 04. Recording speed: 1,000 fps, playback rate: 20 fps.
- Movie S5: Successful prey capture event (PCA) 05. Recording speed: 1,000 fps, playback rate: 20 fps.
- Movie S6: Successful prey capture event (PCA) 06. Recording speed: 1,000 fps, playback rate: 20 fps.
- Movie S7: Successful prey capture event (PCA) 07. Recording speed: 1,000 fps, playback rate: 20 fps.
- Movie S8: Successful prey capture event (PCA) 08. Recording speed: 1,000 fps, playback rate: 20 fps.
- Movie S9: Successful prey capture event (PCA) 09. Recording speed: 1,000 fps, playback rate: 20 fps.
- Movie S10: Successful prey capture event (PCA) 10. Recording speed: 1,000 fps, playback rate: 20 fps.
- Movie S11: Unsuccessful prey capture event (PCA) 11. Recording speed: 1,000 fps, playback rate: 20 fps.
- Movie S12: Unsuccessful prey capture event (PCA) 12. Recording speed: 1,000 fps, playback rate: 20 fps.
- Movie S13: Unsuccessful prey capture event (PCA) 13. Recording speed: 1,000 fps, playback rate: 20 fps.
- Movie S14: Unsuccessful prey capture event (PCA) 14. Recording speed: 1,000 fps, playback rate: 20 fps.
- Movie S15: Escape of a copepod out of the triggered *Aldrovanda* trap. Recording speed: 1,000 fps, playback rate: 20 fps.
